# Supplementary material for: Poly(2,5-bis(2-octyldodecyl)-3,6-di(furan-2-yl)-2,5-dihydro-pyrrolo[3,4-c]pyrrole-1,4-dione-co-thieno[3,2-b]thiophene): a high performance polymer semiconductor for both organic thin film transistors and organic photovoltaics
Source: Royal Society of Chemistry journal article supplement (doi:10.1039/c2cp40937b), 2012-01-01
Supplement: c2cp40937b.pdf [file c2cp40937b.pdf]

*Supplementary Information*

Poly(2,5-bis(2-octyldodecyl)-3,6-di(furan-2-yl)-2,5-dihydro-pyrrolo[3,4-c]pyrrole-1,4-dione-co-thieno[3,2-b]thiophene): A High Performance Polymer Semiconductor For Both Organic Thin Film Transistors and Organic Photovoltaics

Yuning Li,\* Prashant Sonar, Samarendra P. Singh, Zi En Ooi, Erica S. H. Lek and Melissa Q. Y. Loh

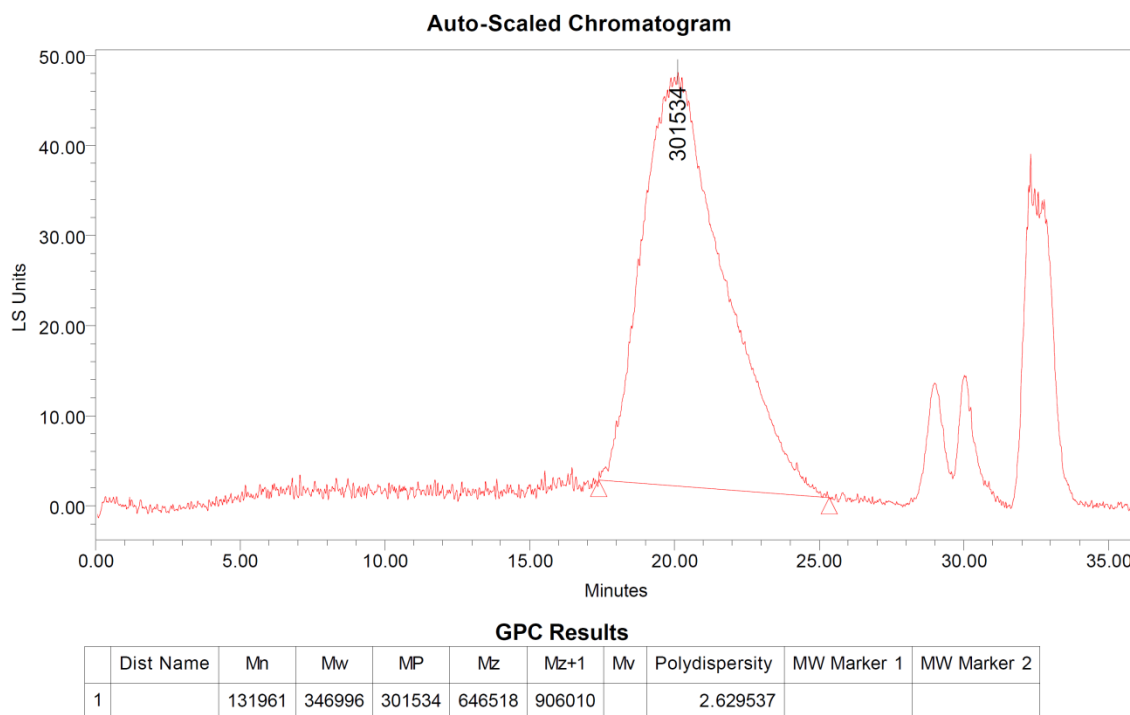

**Figure S1.** Gel permeation chromatography (GPC) results of PDBF-co-TT measured on a Waters 2690 System using THF as eluent and polystyrene as standards at a column temperature of 40 °C.

Sample: YL219  
Size: 2.5200 mg  
Method: YL102

DSC

File: G:\Yuning Li\YL219-4.001  
Operator: Lin Ting Ting  
Run Date: 28-Jun-10 14:05

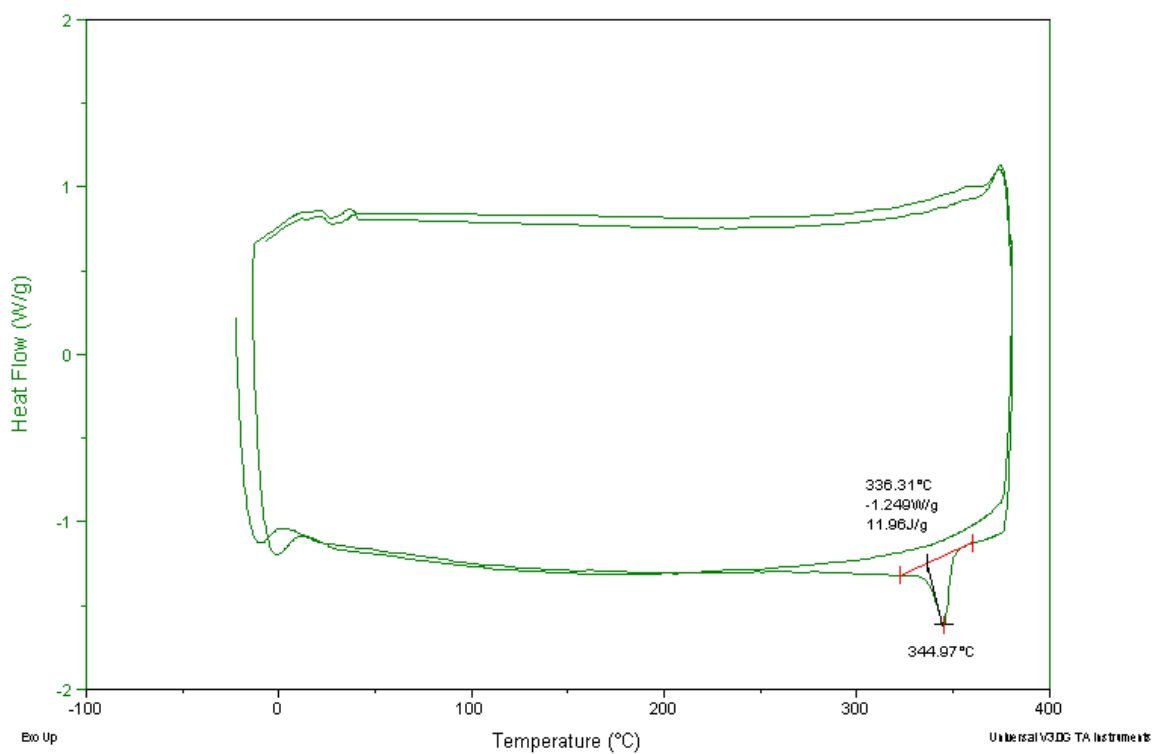

**Figure S2.** Differential scanning calorimetry (DSC) profiles of PDBF-co-TT obtained on a TA Instrument DSC Q100 instrument at a scanning rate of  $10^{\circ}\text{C min}^{-1}$  under nitrogen.
